# Supplementary material for: Impedimetric DNA Sensors for Epirubicin Detection Based on Polythionine Films Electropolymerized from Deep Eutectic Solvent
Source: MDPI journal article supplement (doi:10.3390/s23198242), 2023-10-04
Supplement: s1 [file s1]

## Electronic Supporting Information

to the article of A.I. Goida, A.M. Rogov, Y.I. Kuzin, A.V. Porfireva, G.A. Evtugyn  
"Impedimetric DNA-Sensor for Epirubicin Detection Based on Polythionine Films  
Electropolymerized from Deep Eutectic Solvent"

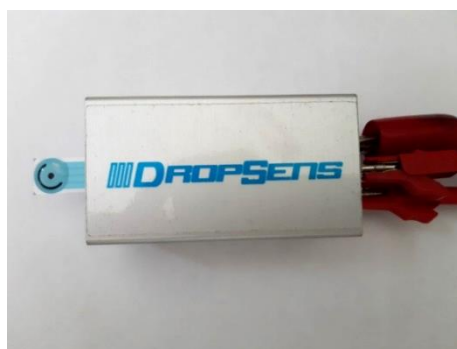

(a)

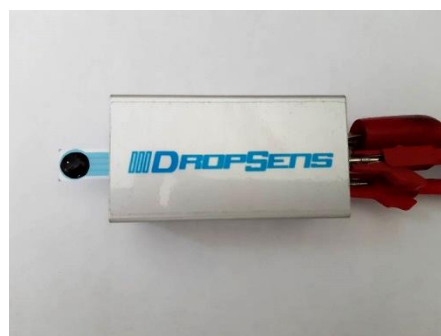

(b)

**Figure S1.** Electrochemical cell design. (a) NADES is drop-casted on the electrode; (b) NADES with thionine is drop-casted on the electrode

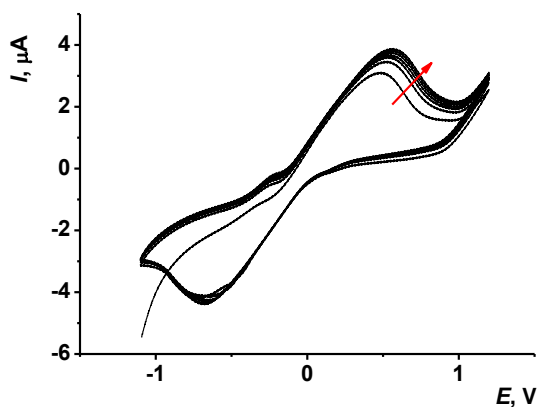

(a)

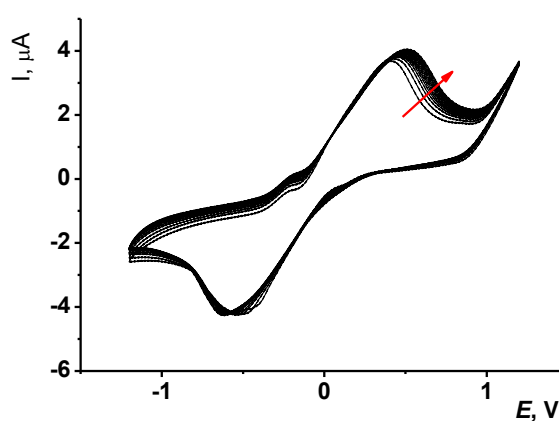

(b)

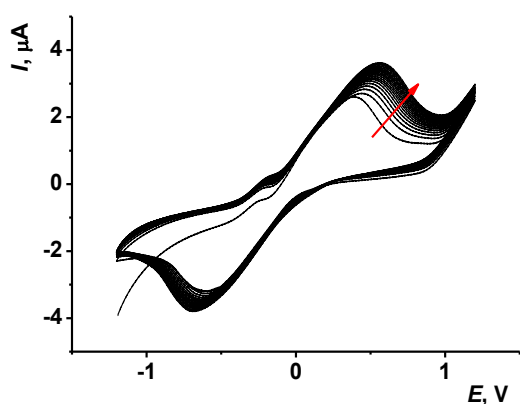

(c)

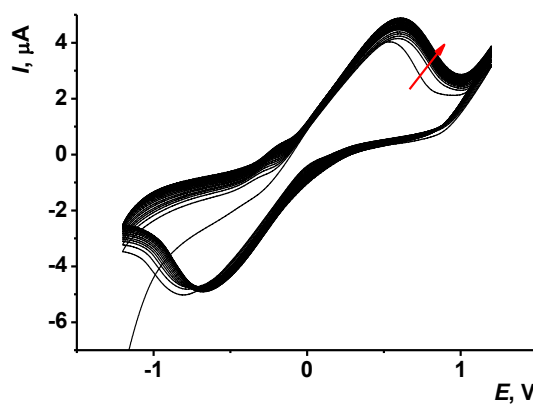

(d)

**Figure S2.** Multiple cyclic voltammograms recorded on the carbon SCE in NADES (citric acid, glucose and water, molar ratio 1:1:6) with 0.067 M thionine. Scan rate 50 mV/s; (a) 7 cycles; (b) 15 cycles; (c) 20 cycles; and (d) 30 cycles of the potential. Arrows indicate changes with increasing number of cycles

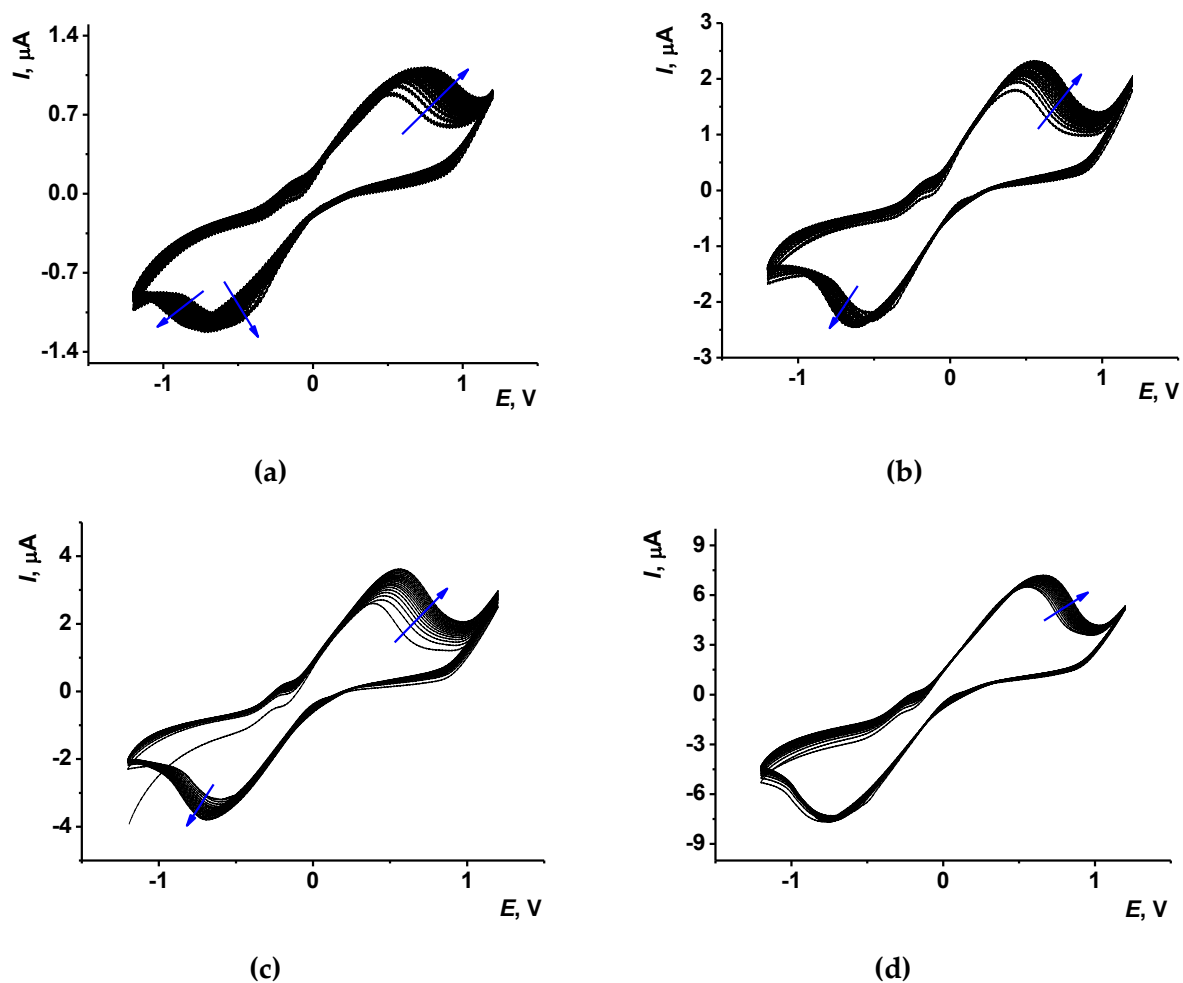

**Figure S3.** Multiple cyclic voltammograms recorded on the carbon SCE in NADES (citric acid, glucose and water, molar ratio 1:1:6), 20 cycles of the potential, scan rate 50 mV/s, in the presence of (a) 0.017; (b) 0.033, (c) 0.067 and (d) 0.10 M of thionine. Arrows indicate changes with increasing number of cycles.

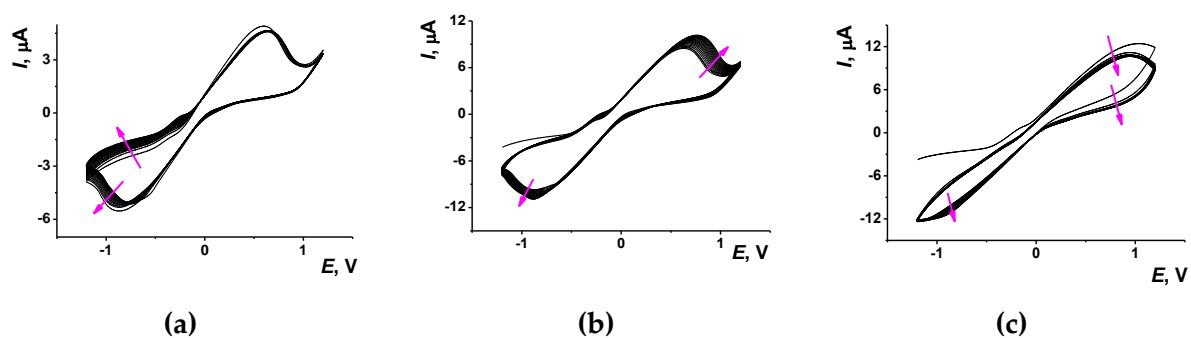

**Figure S4.** Multiple cyclic voltammograms recorded on the carbon SCE in NADES (citric acid, glucose and water, molar ratio 1:1:6) containing 0.1 M thionine, 20 cycles, at the scan rate (a) 50, (b) 100, and (c) 300 mV/s. Arrows indicate changes with increasing number of cycles.

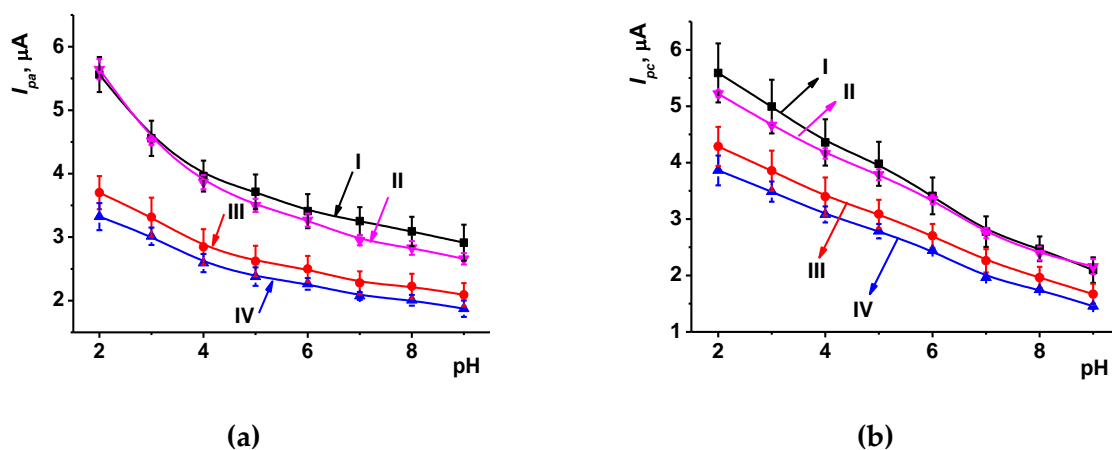

**Figure S5.** The pH dependence of the anodic (a) and cathodic (b) peak currents of the PTN<sub>aq</sub> with no signal stabilization (I), open-circuit (non-current) stabilization (II), tenfold consecutive scans in a single drop of HEPES (III), and tenfold consecutive scans in the drop of HEPES refreshed after each scan (IV). Electropolymerization of thionine at SPE in 0.1 M HEPES containing 0.03 M NaCl, pH 7.0, 100 mV/s, 20 cycles

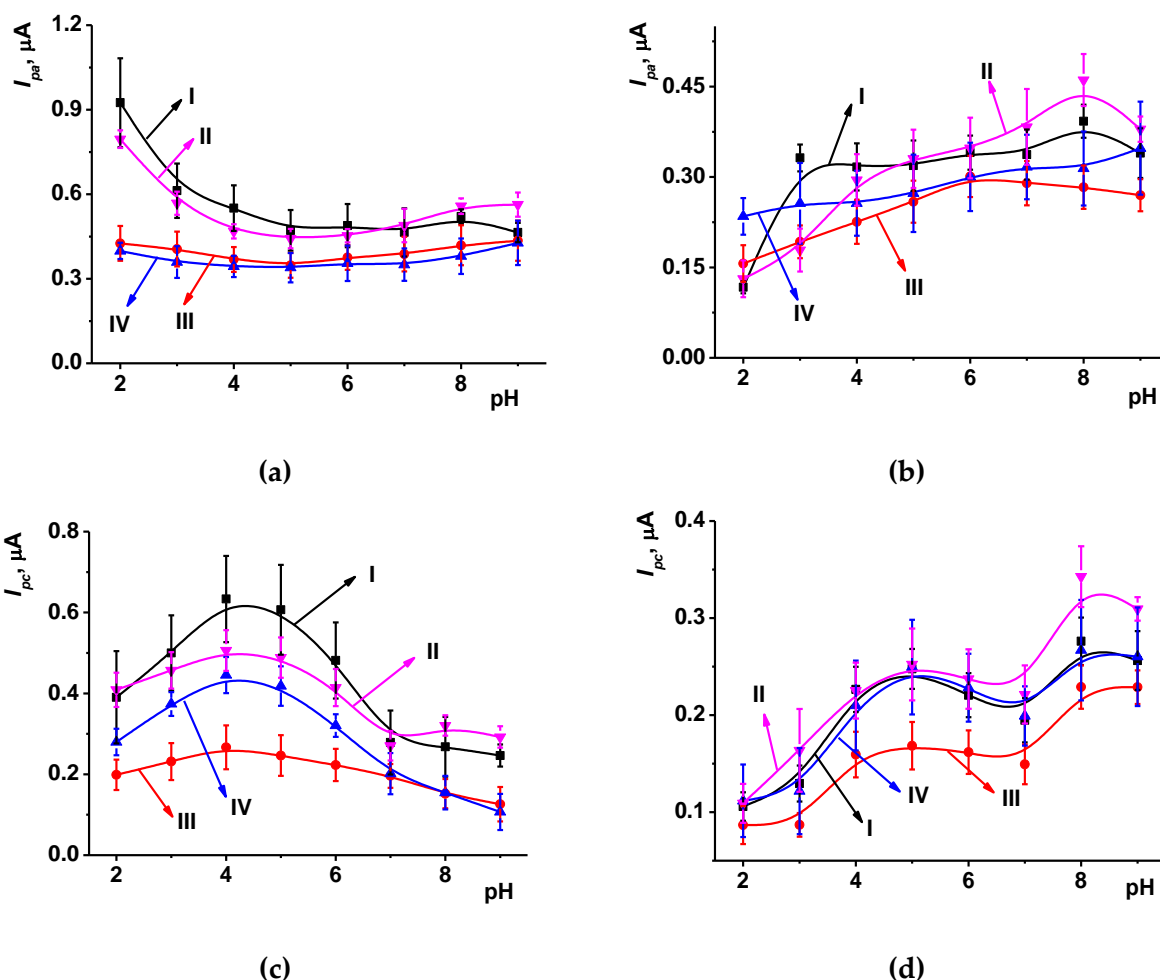

**Figure S6.** The pH dependence of the anodic peak current of the monomer (a), polymer (b), of the cathodic peak currents of the monomer (c), polymer (d) for the PTN<sub>NADES</sub>, with no signal stabilization (I), open-circuit (non-current) stabilization (II), tenfold consecutive scans in a single drop of HEPES (III), and tenfold consecutive scans in the drop of HEPES refreshed after each scan (IV). Electropolymerization of thionine on SPE in 0.1 M HEPES containing 0.03 M NaCl, pH 7.0, 100 mV/s, 20 cycles

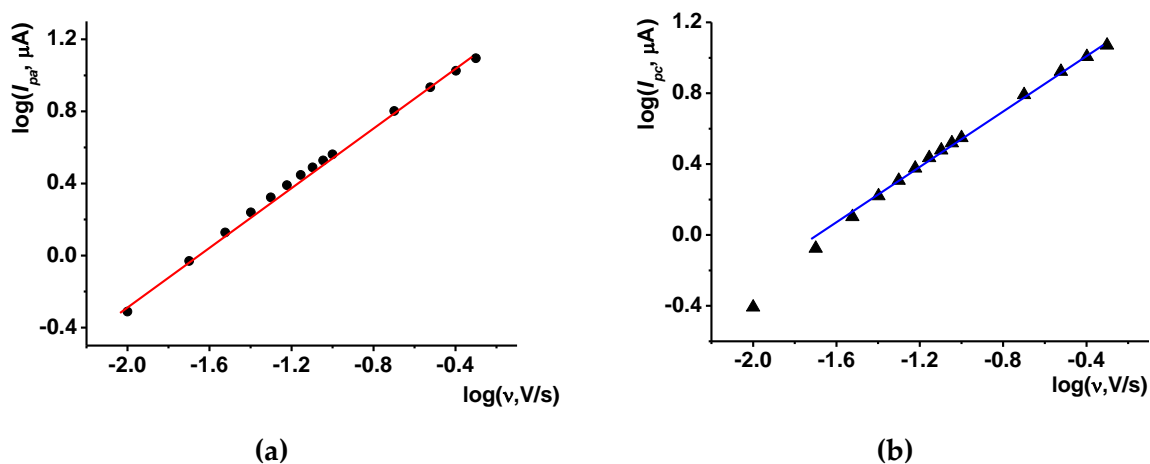

**Figure S7.** The scan rate ( $v$ ) dependence of the anodic  $I_{pa}$  (a) and cathodic  $I_{pc}$  (b) peak currents of the PTN<sub>aq</sub> in 0.1 M HEPES containing 0.03 M NaCl, pH 7.0, scan rate 10 - 500 mV/s

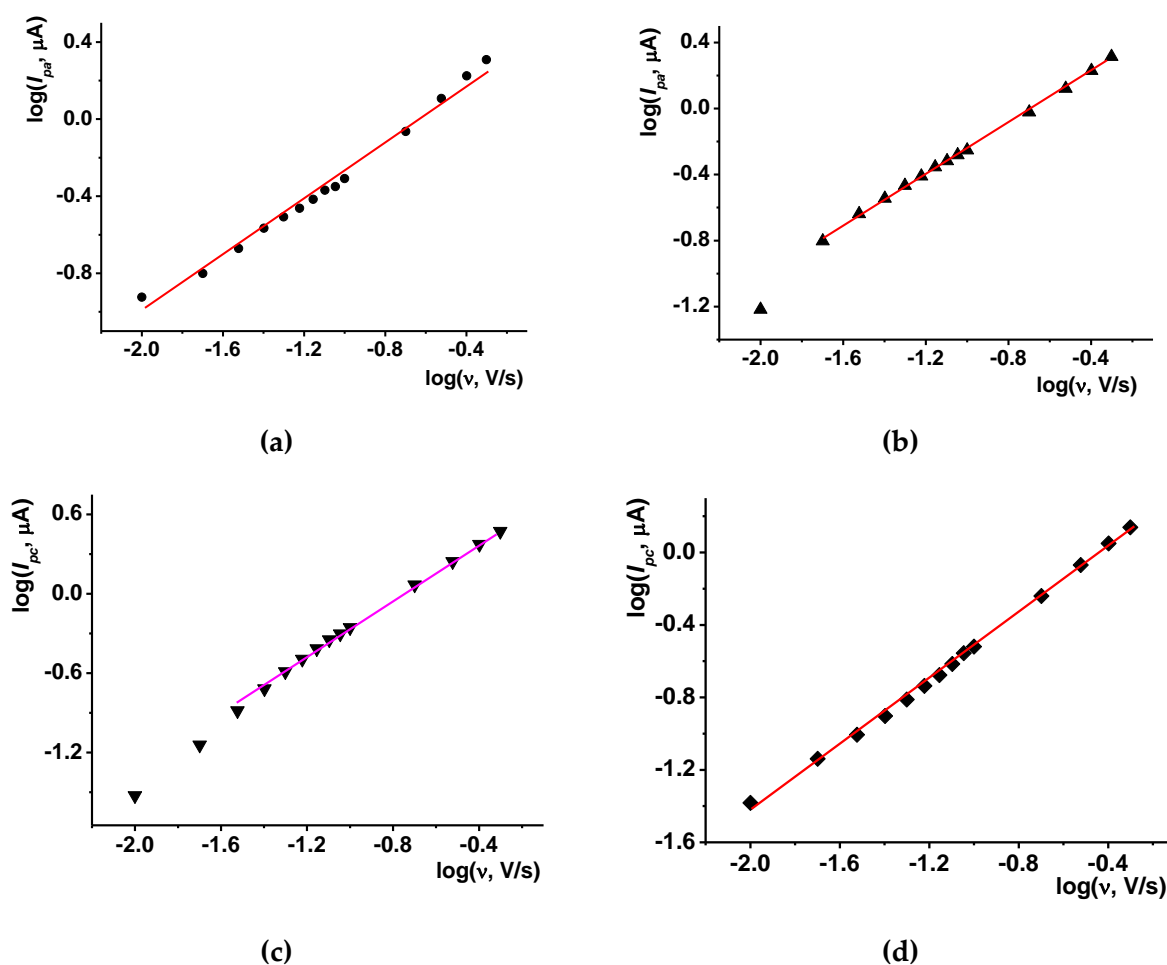

**Figure S8.** The scan rate dependence of the anodic ( $I_{pa}$ ) peak current of the monomer (a), polymer (b), of the cathodic ( $I_{pc}$ ) peak current of the monomer (c), polymer (d) for the PTN<sub>NADES</sub> in 0.1 M HEPES containing 0.03 M NaCl, pH 7.0, 10 - 500 mV/s

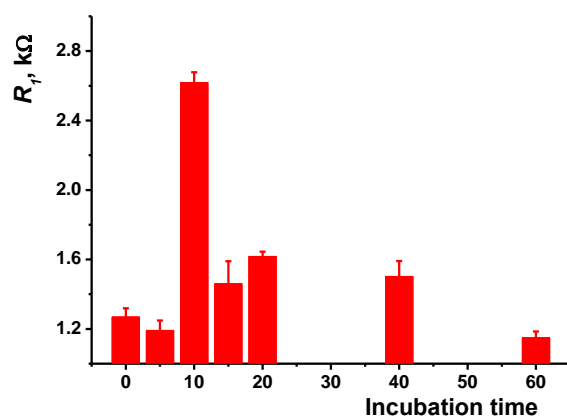

**Figure S9.** The charge transfer resistance on the modifying layer – solution interface for various incubation time in 10  $\mu$ M epirubicin, PTN<sub>NADES</sub> in 0.1 M HEPES containing 0.03 M NaCl, pH 7.0, in presence of 0.01 M  $[\text{Fe}(\text{CN})_6]^{3-/4-}$  redox probe
